# Supplementary material for: Development of a facile electrochemical sensor based on GCE modified with one-step prepared PNMA-CeO2-fMWCNTs composite for simultaneous detection of UA and 5-FU
Source: Royal Society of Chemistry journal article supplement (doi:10.1039/d3ay02099a), 2023-12-01
Supplement: d3ay02099a1.pdf [file d3ay02099a1.pdf]

## Development of a facile electrochemical sensor based on GCE modified with one-step prepared PNMA-CeO<sub>2</sub>-fMWCNTs composite for simultaneous detection of UA and 5-FU

*Kübra TURAN<sup>1</sup>, Ahmet ÜĞE<sup>2</sup>, Bülent ZEYBEK<sup>2</sup>, Gözde AYDOĞDU TİĞ<sup>1\*</sup>*

<sup>1</sup> Ankara University, Faculty of Science, Department of Chemistry, Ankara, 06100, Türkiye

<sup>2</sup> Kütahya Dumlupınar University, Faculty of Science and Arts, Department of Chemistry, Kütahya, 43100, Türkiye

### Supplementary Material

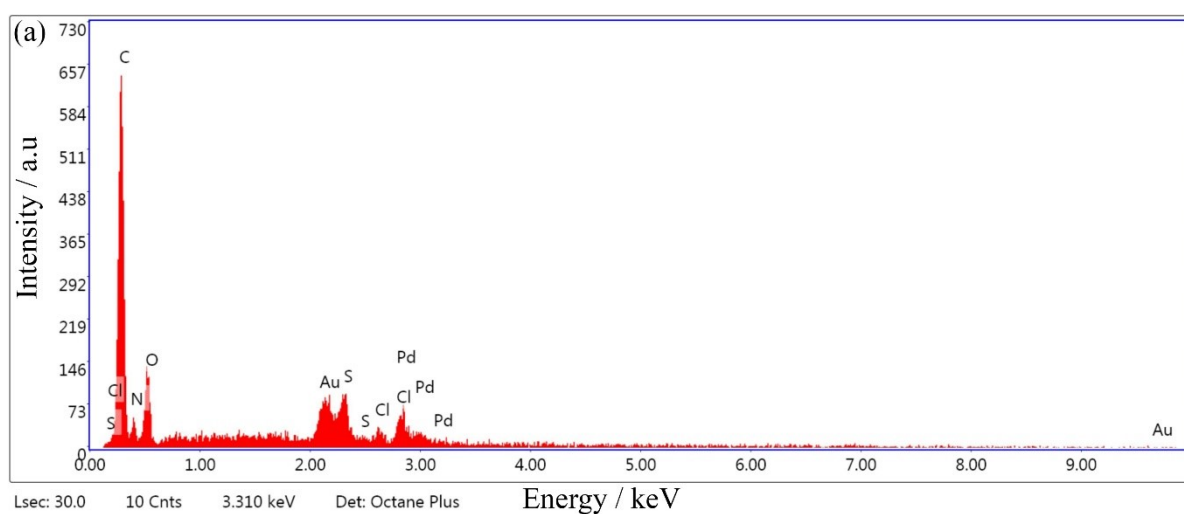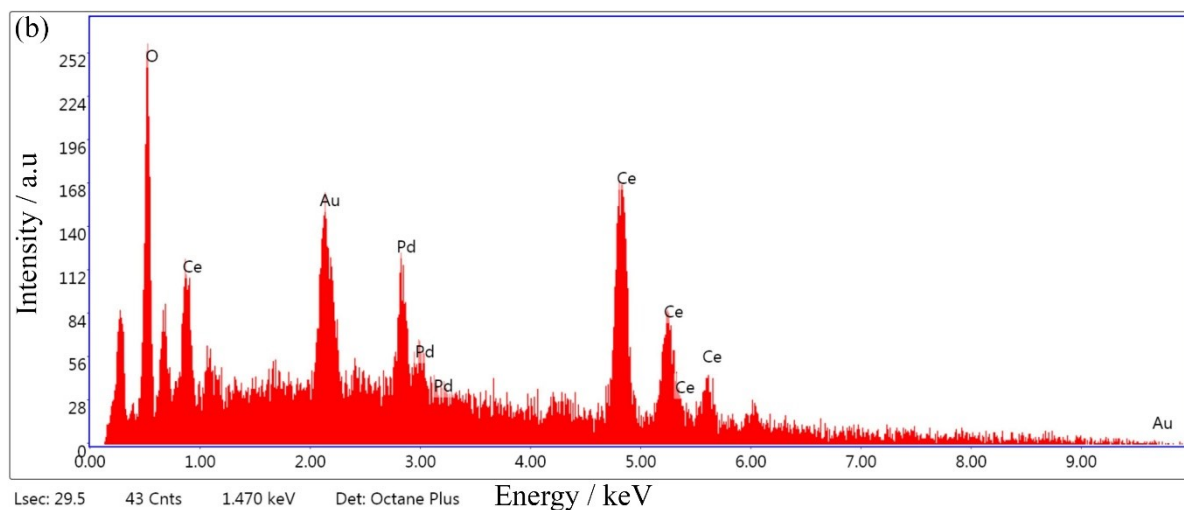

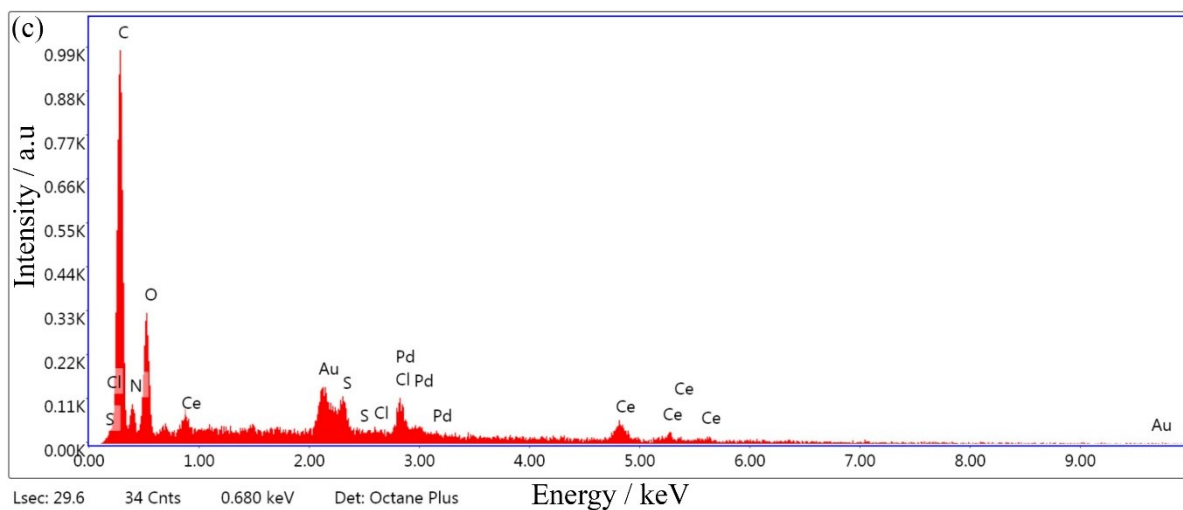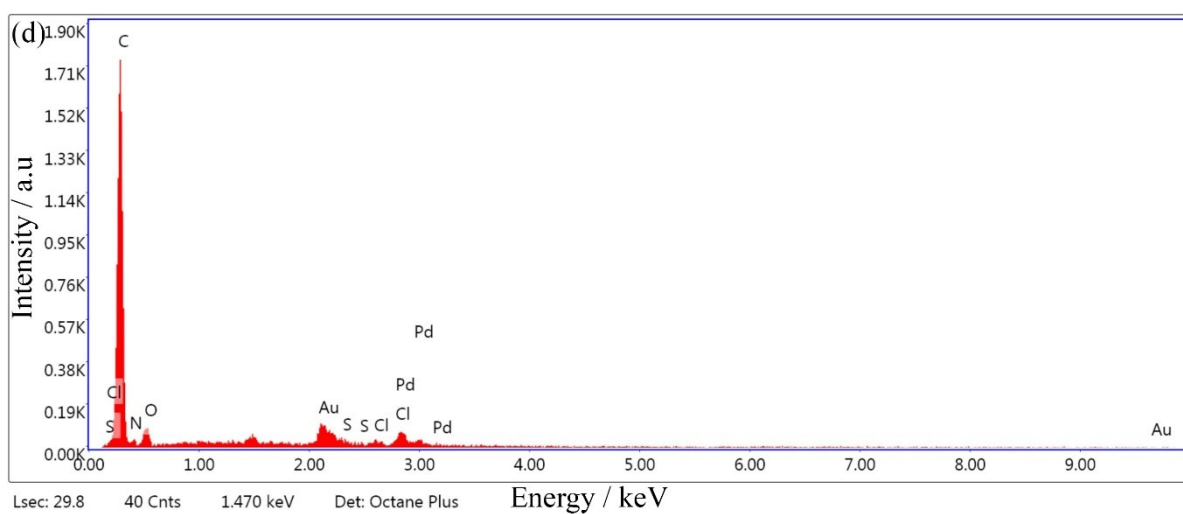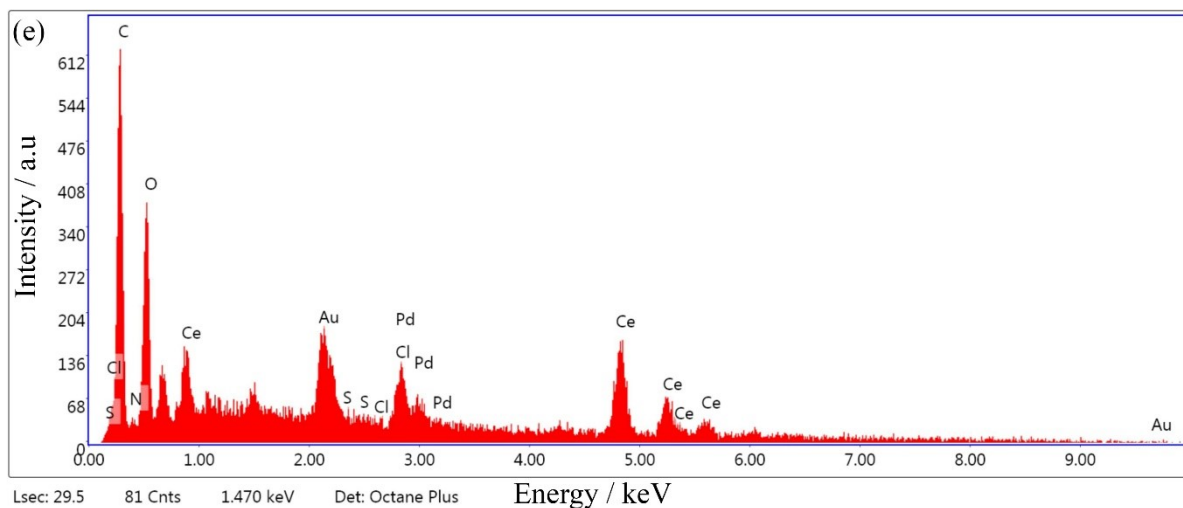

**Fig. S1** EDX analysis of (a) PNMA, (b) CeO<sub>2</sub> NPs, (c) PNMA-CeO<sub>2</sub>, (d) PNMA-*f*MWCNT, and (e) PNMA-CeO<sub>2</sub>-*f*MWCNT composites.

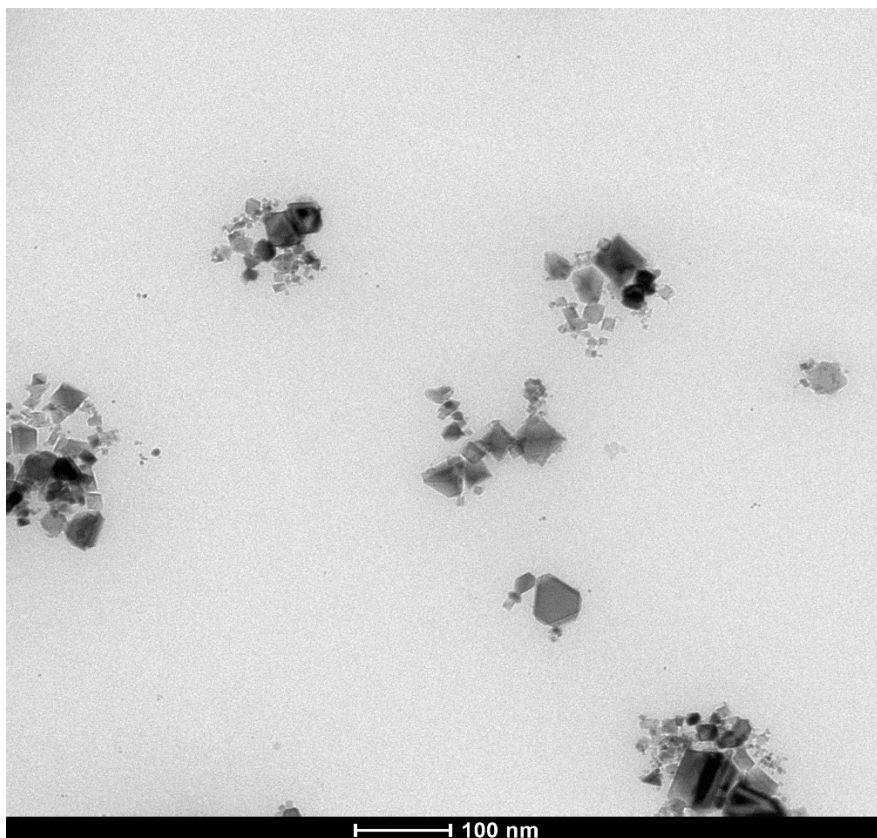

**Fig. S2** TEM micrograph of CeO<sub>2</sub> NPs.

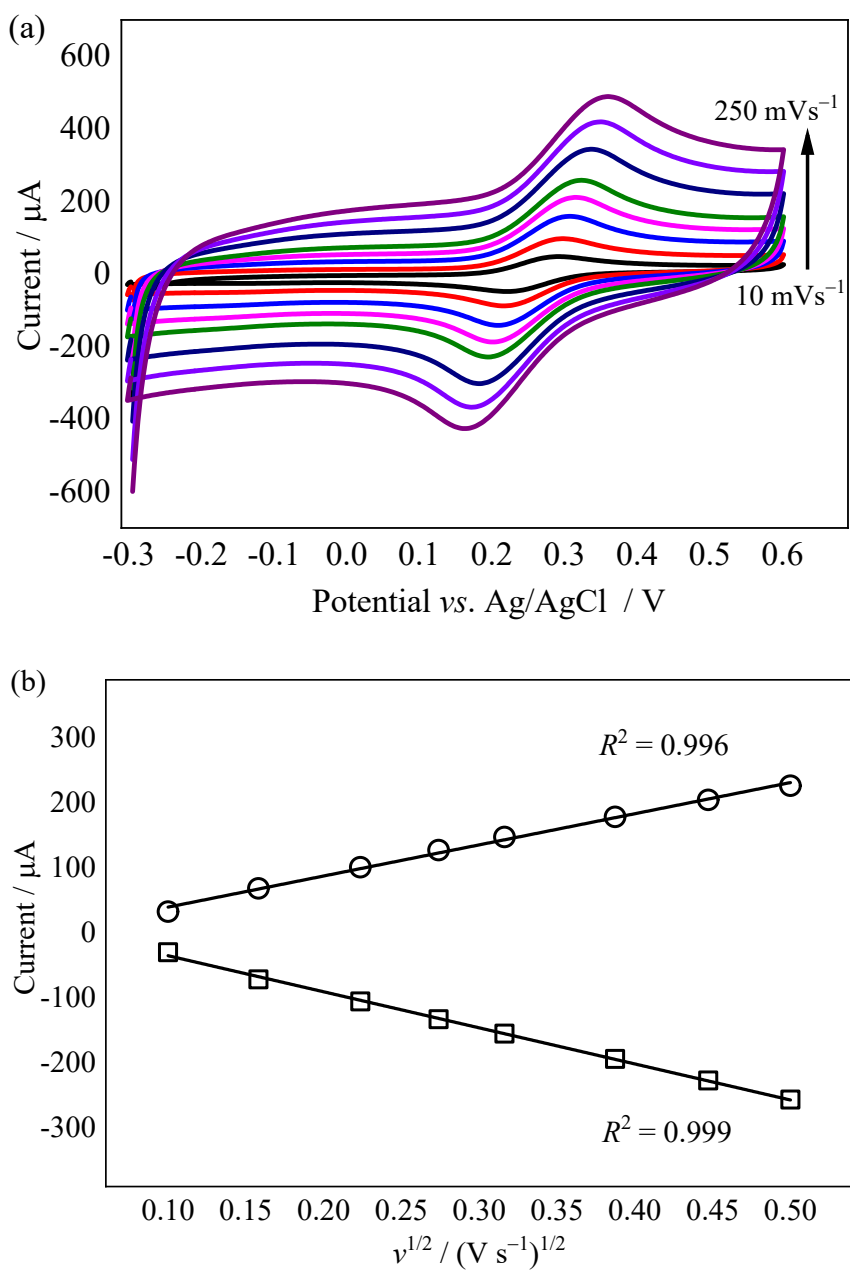

**Fig. S3** (a) CVs recorded at different scan rates, (b) the plot of the peak current against the square root of the scan rate at the GCE/PMMA-CeO<sub>2</sub>-fMWCNTs electrode in 0.1 mol L<sup>-1</sup> KCl solution containing 5.0 mmol L<sup>-1</sup> Fe(CN)<sub>6</sub><sup>3-/4-</sup>.

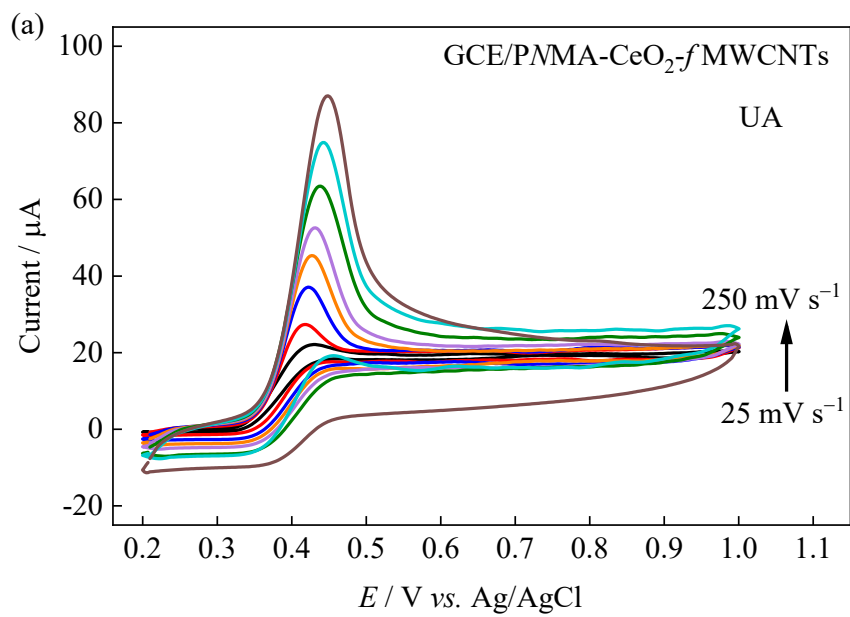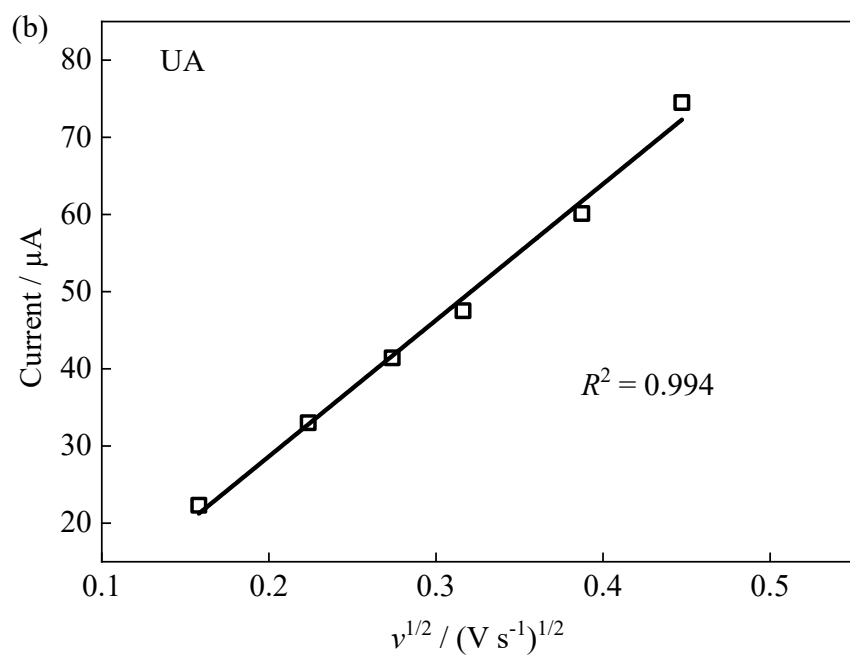

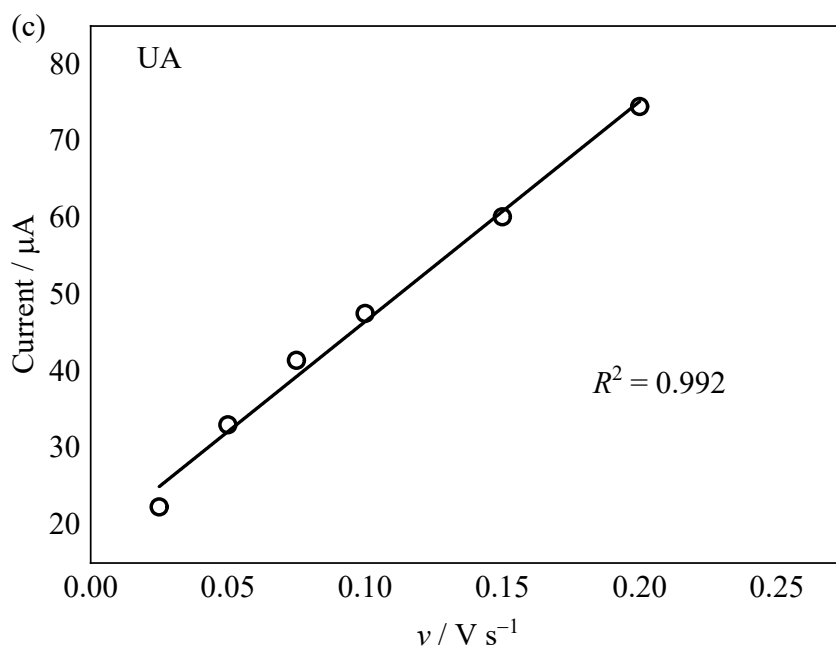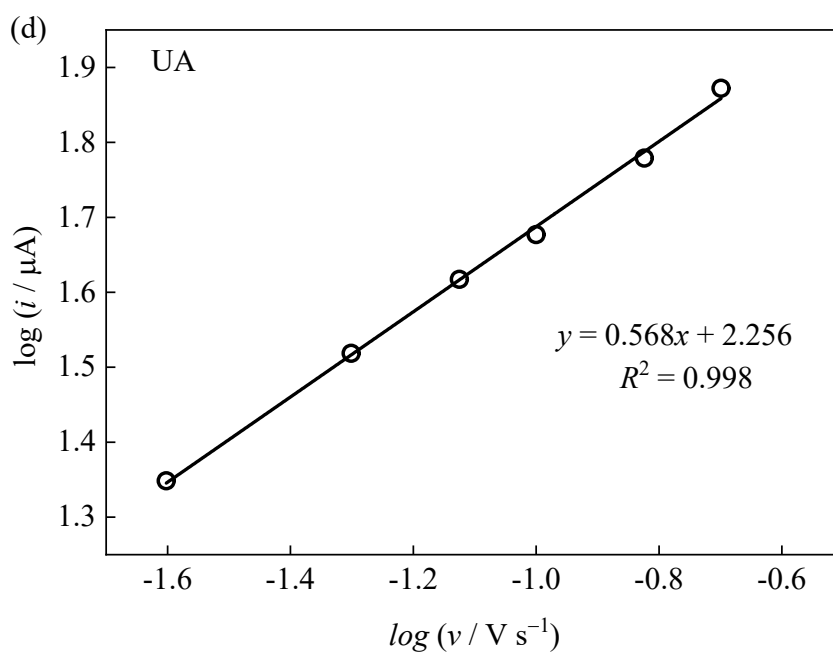

**Fig. S4** CVs of (a) GCE/PMMA-CeO<sub>2</sub>-fMWCNTs electrode at the scanning speeds of 0.025–0.250 V s<sup>-1</sup> in 0.1 mol L<sup>-1</sup> PBS with 0.3 mmol L<sup>-1</sup> UA. The plots of the (b) Current vs.  $\nu^{1/2}$ , (c) Current vs.  $\nu$ , and (d)  $\log i_p$  vs.  $\log \nu$ .

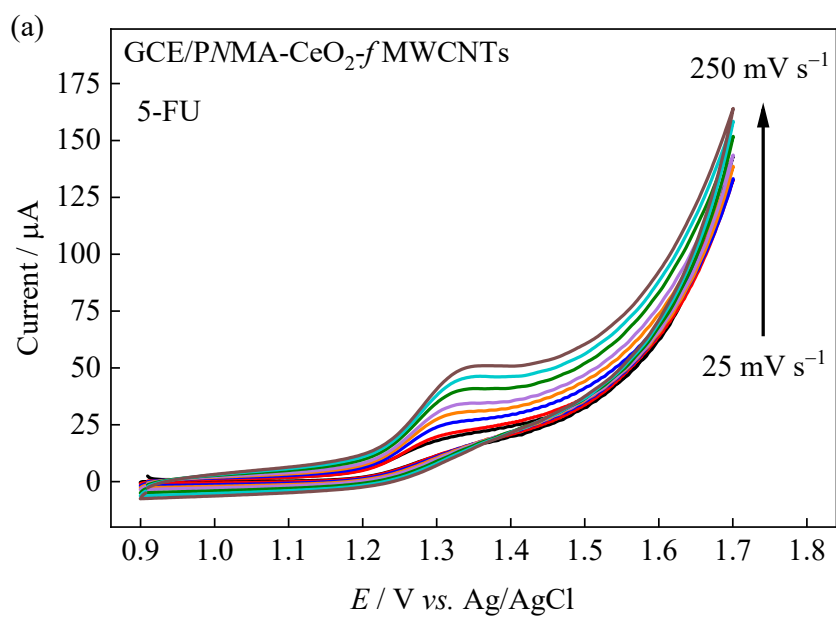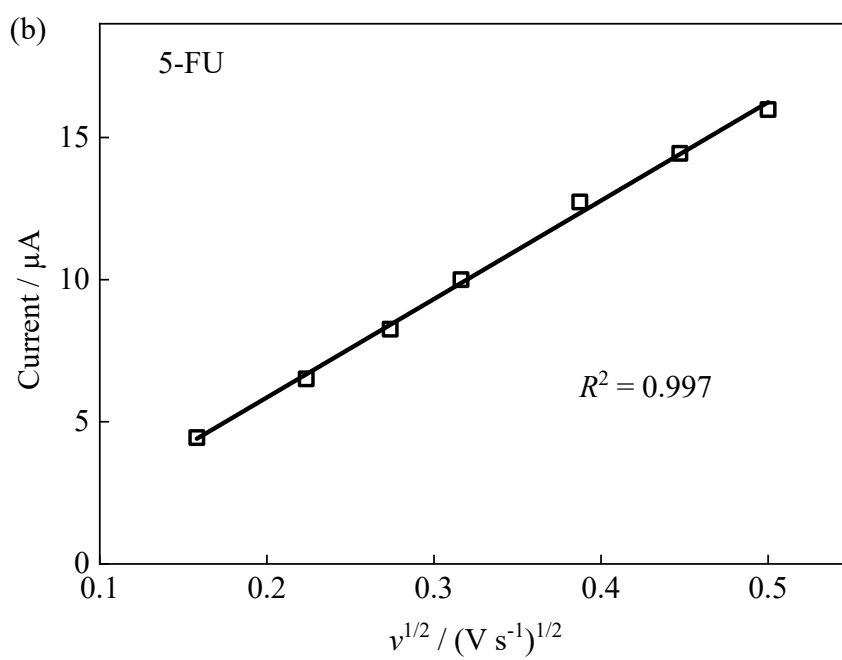

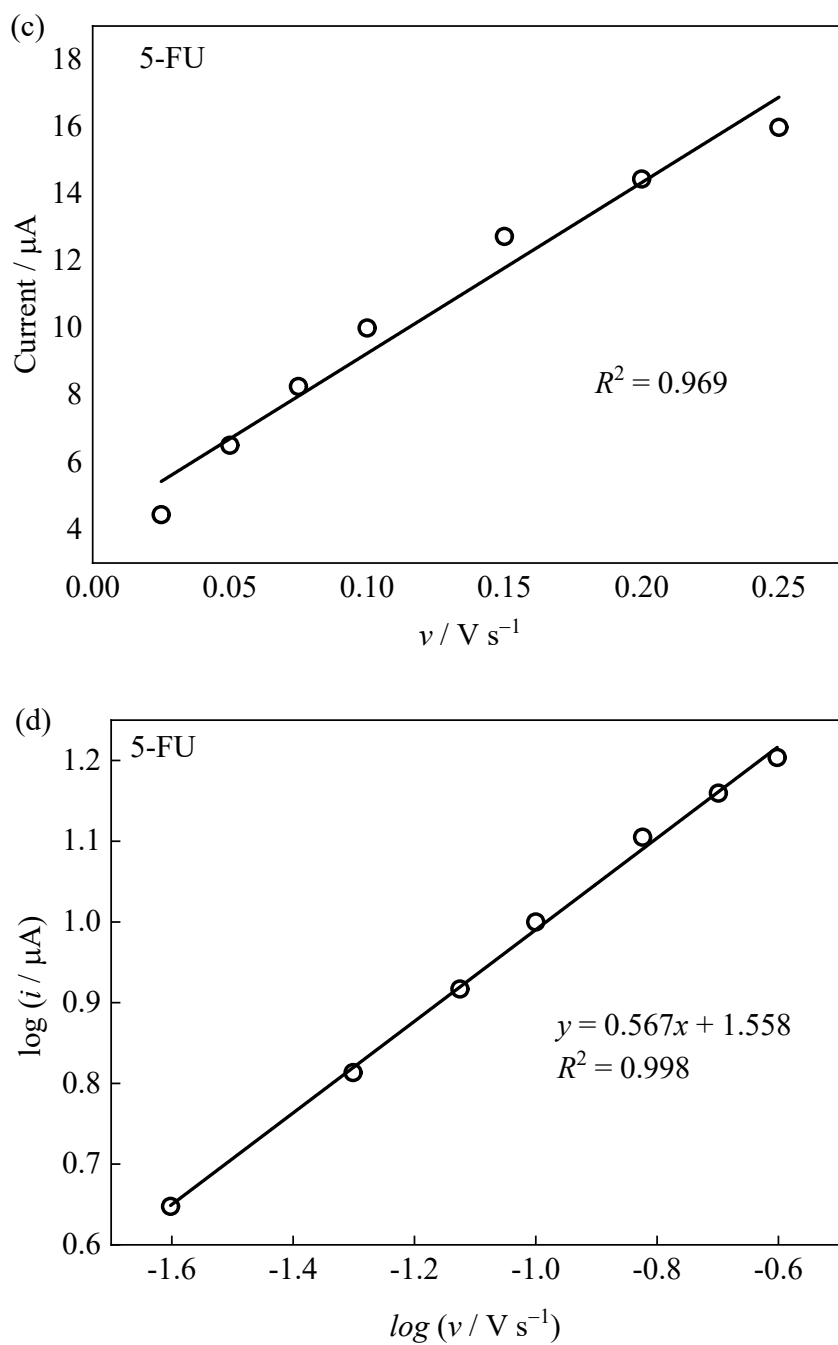

**Fig. S5** CVs of (a) GCE/PMMA-CeO<sub>2</sub>-fMWCNTs electrode at the scanning speeds of 0.025–0.250 V s<sup>-1</sup> in 0.1 mol L<sup>-1</sup> PBS with 1.2 mmol L<sup>-1</sup> 5-FU. The plots of the (b) Current vs.  $\nu^{1/2}$ , (c) Current vs.  $\nu$ , and (d)  $\log i_p$  vs.  $\log \nu$ .



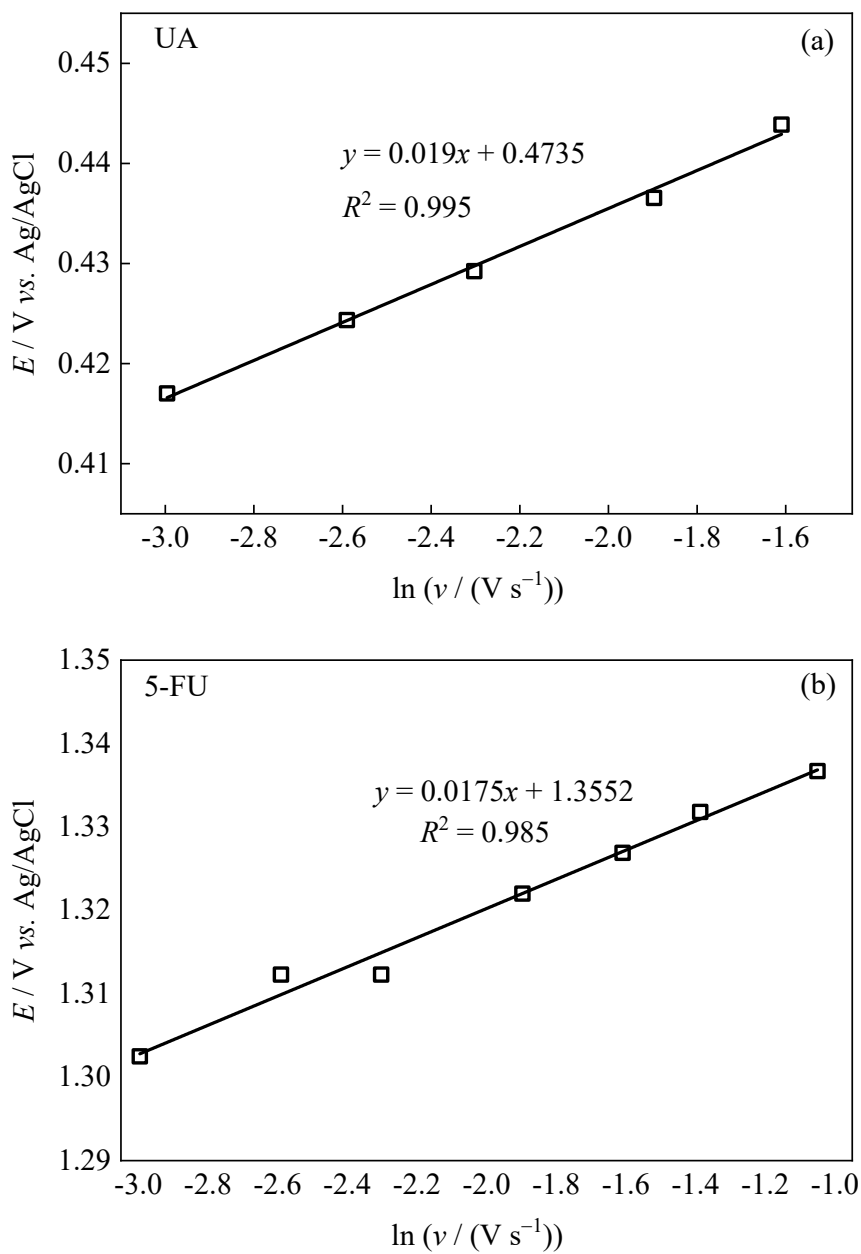

**Fig. S6** The plots of the  $E_p$  vs.  $\ln v$  for (a) UA and (b) 5-FU in 0.1 mol L<sup>-1</sup> PBS containing (a) 1.2 mmol L<sup>-1</sup> UA and (b) 1.2 mmol L<sup>-1</sup> 5-FU at GCE/PNMA-CeO<sub>2</sub>- $\beta$ MWCNTs.
